# Supplementary material for: Mobile Continuous Kidney Replacement Therapy for Appropriate Radioactive Iodine Administration in a Hemodialysis Patient: A Case Report
Source: Research Square preprint supplement (doi:10.21203/rs.3.rs-7972649/v1), 2025-11-18
Supplement: Supplementary file 1 [file 240a51094533b9ed5859ae0f.xlsx]

## Sheet: シート1
References No.	age	sex	dialysis	dose(MBq)	timing	time(h)	Blood flow, Dialysate flow rate	Before(µSv)	After(µSv)	reduction rate(%)
［6］	35	M	HD	1850	48h	4h	none	64	20	0.69
					72h	4h	none	16	6	0.63
［7］	51	M	HD	3700	20h	4h	380ml/min, none	147	49.9	0.66
					44h	4h	380ml/min, none	43	16.7	0.61
［7］	52	F	HD	3700	day1	4h	300ml/min, none	170	39.9	0.77
					day2	4h	300ml/min, none	34	1.4	0.96
［8］	43	F	HD	3700	20h	4h	400ml/min, 500ml/min	100	30	0.7
This case	36	M	HD	555	67h	6h	100ml/min, 100ml/min	18	6.8	0.62
				1110	70h	6h	150ml/min, 100ml/min	29	15.6	0.46
